# Supplementary material for: Does facility birth reduce maternal and perinatal mortality in Brong Ahafo, Ghana? A secondary analysis using data on 119 244 pregnancies from two cluster-randomised controlled trials
Source: PubMed Central journal article supplement (PMC6639244; doi:10.1016/s2214-109x(19)30165-2), 2019-07-11
Supplement: mmc1.pdf [file mmc1.pdf]

# THE LANCET

## Global Health

### Supplementary appendix

This appendix formed part of the original submission and has been peer reviewed. We post it as supplied by the authors.

Supplement to: Gabrysch S, Nesbitt RC, Schoeps A, et al. Does facility birth reduce maternal and perinatal mortality in Brong Ahafo, Ghana? A secondary analysis using data on 119 244 pregnancies from two cluster-randomised controlled trials. *Lancet Glob Health* 2019; **7**: e1074–87.

## **Supplementary appendix**

### **Contents**

#### **1. Supplementary figures**

Figure A1: Flowchart

Figure A2: Shape of distance relationships

Figure A3: Outcomes by birth year

#### **2. Supplementary tables**

Table A1: Adjusted associations of individual-level facility birth with seven mortality outcomes

Table A2: Crude associations of cluster-level facility birth, wealth, education and distances with nine health service use and mortality outcomes

Table A3: Adjusted associations of cluster-level facility birth, wealth, education and distances with nine health service use and mortality outcomes (underlying Figures 2 and 3)

Table A4: Interaction of time period with cluster-level facility birth, wealth, education and distances in their effect on four mortality outcomes (underlying Figure 4)

#### **3. Sensitivity analyses**

- Crude analysis in restricted sample (Table A5)
- Road distance and travel time (Table A6)
- Restricted sample to women with good pregnancy surveillance (Table A7)
- Three-level random effects model (Table A8)

## 1. Supplementary Figures

Figure A1: Flowchart of total numbers of pregnancies, deliveries and deaths in adjusted and unadjusted analyses

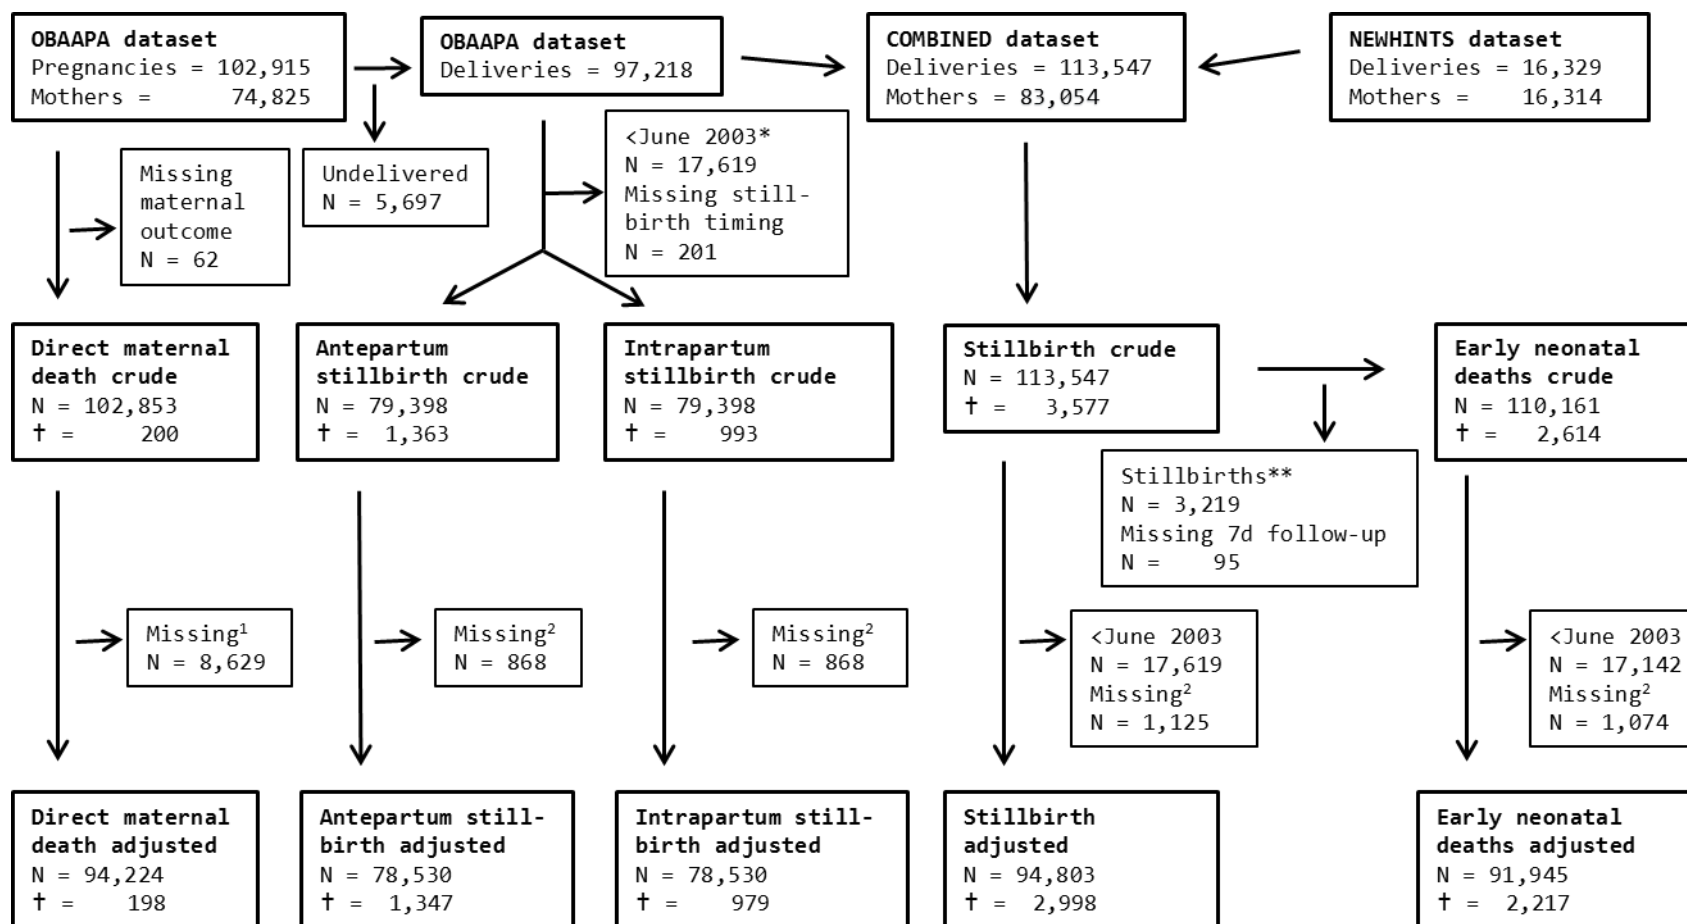

<sup>1</sup> Missings in religion, parity, ethnicity

<sup>2</sup> Missings in religion, parity, ethnicity, household wealth, education, multiple birth, occupation

\* Timing of stillbirth was only collected after June 2003.

\*\* Stillbirths minus those 286 multiple deliveries with a stillbirth where a twin/triplet baby was live born

**Figure A2: Modeled effects of distance to quality care on service use and mortality**

Estimated associations of distance to the closest facility providing Comprehensive Emergency Obstetric Care (CEmOC) with facility birth and Caesarean section (Panel A) and mortality outcomes (Panel B), based on the adjusted model with log-transformed distance.

Panel A:

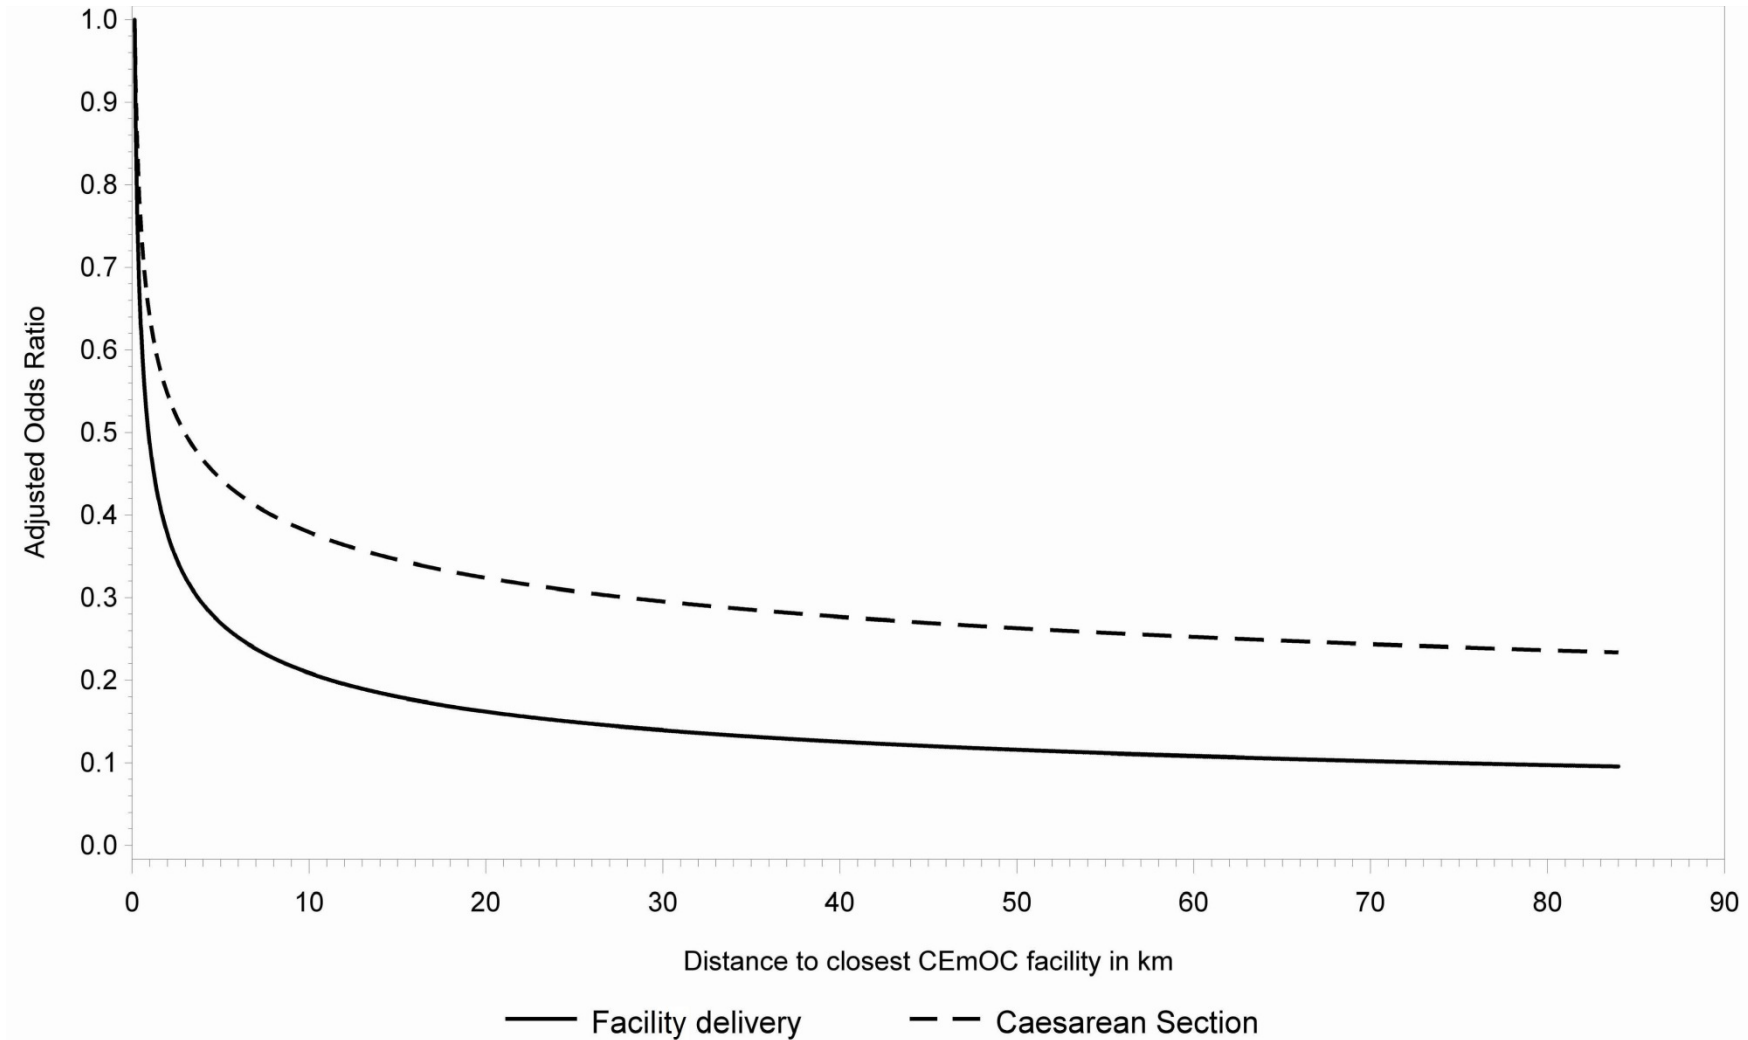

Panel B:

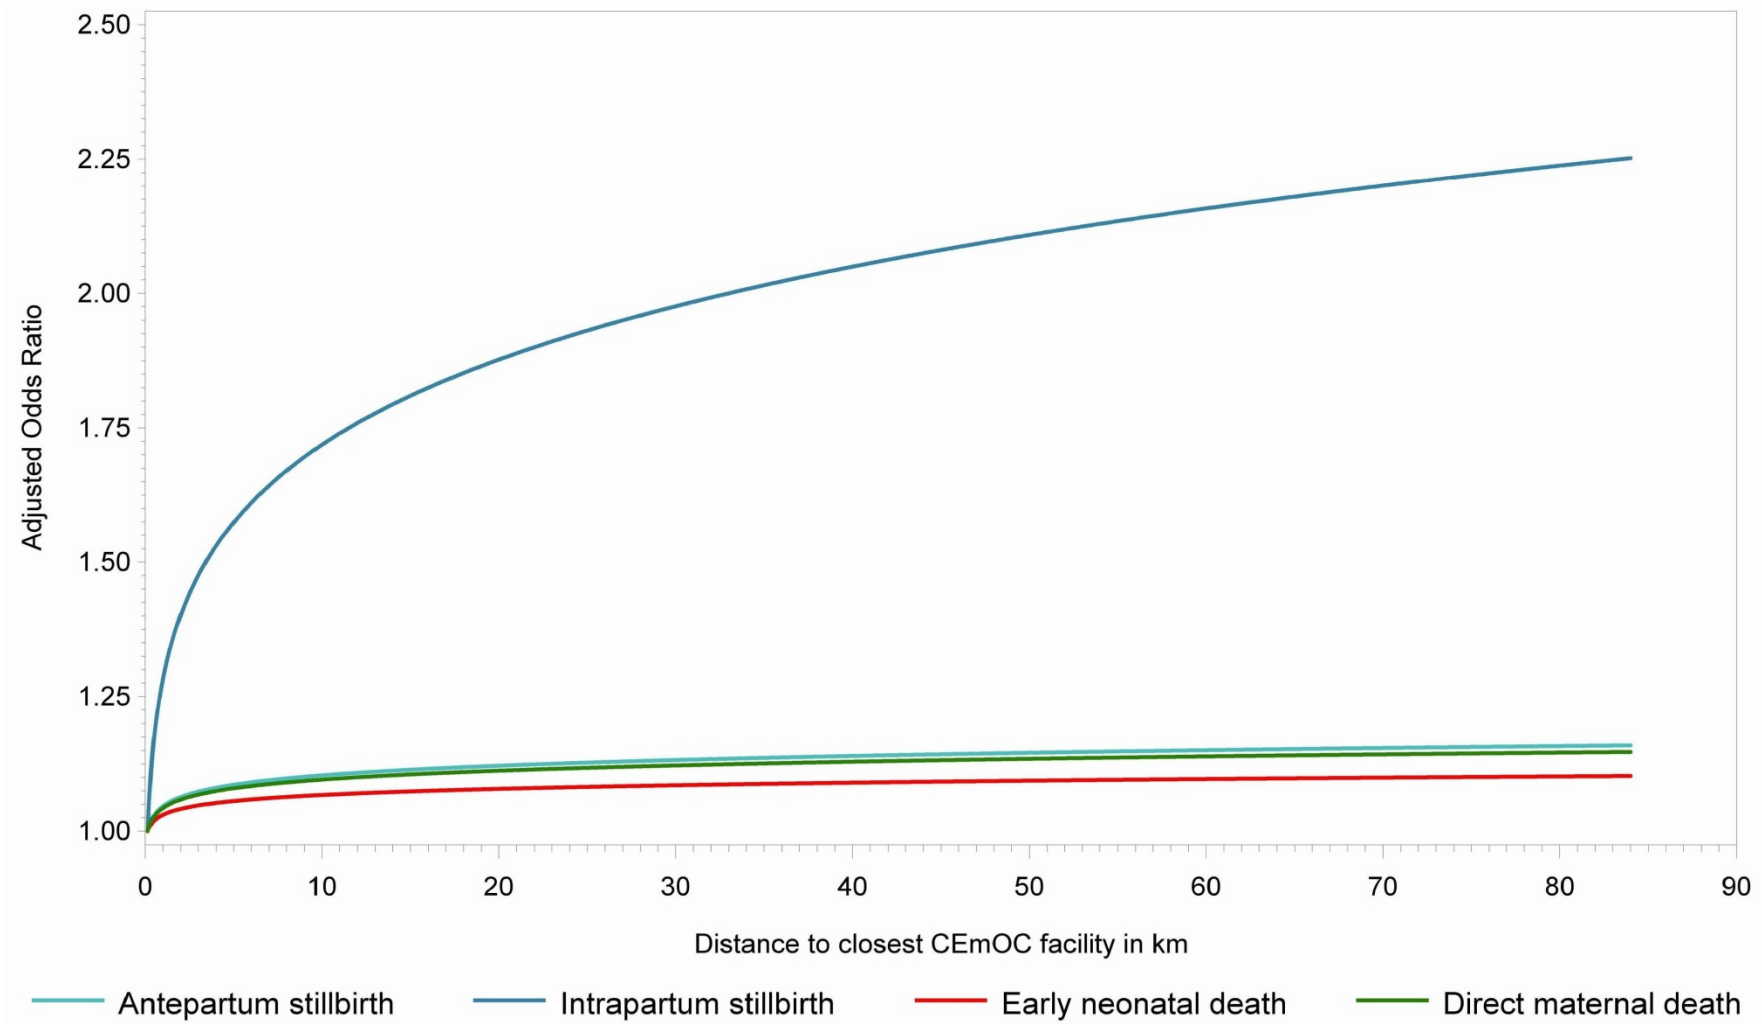

**Figure A3: Health service use and mortalities by birth year**

Facility birth and Caesarean section (right axis), and mortalities (left axis) are shown by year of birth. The grey shaded bars signify the distribution of deliveries over the years.

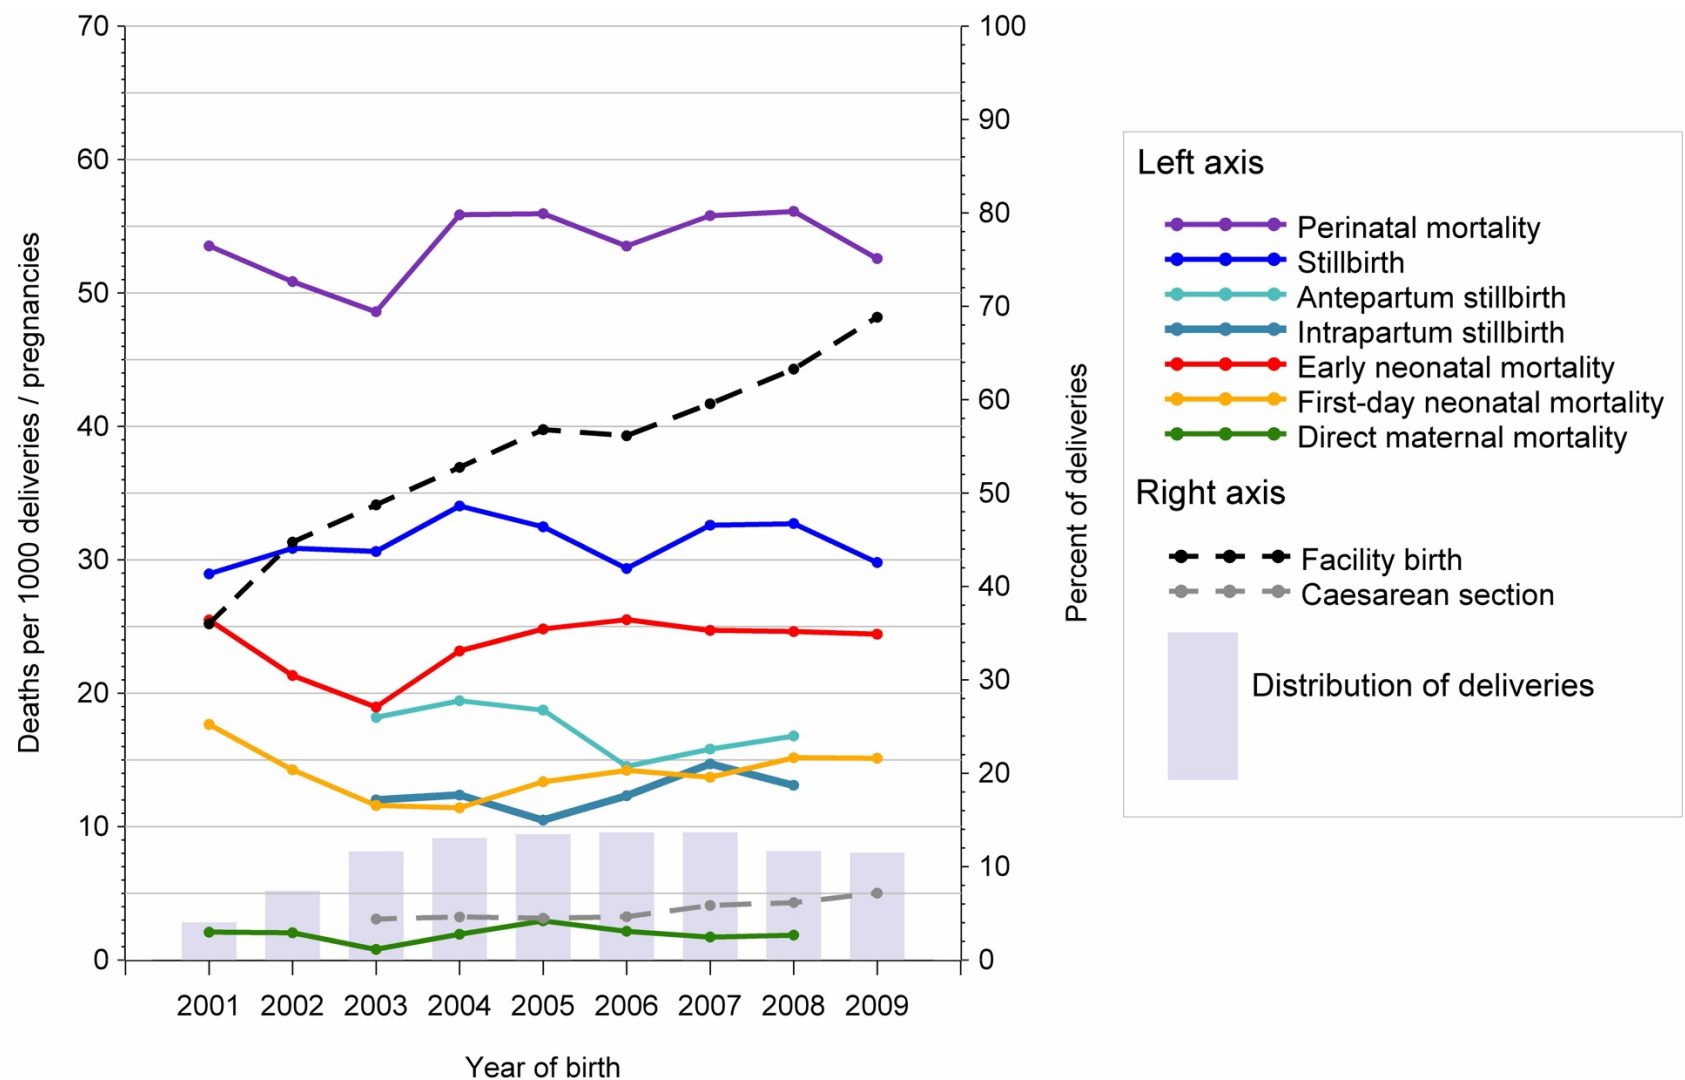

## 2. Supplementary Tables

**Table A1: Adjusted associations of individual-level facility birth with seven mortality outcomes**

Each line of results comes from a separate regression model of facility birth on an outcome, adjusting for confounders as specified in the methods section, using surveillance data from 2003 (for maternal mortality from 2000) to 2009 (for maternal mortality, antepartum and intrapartum stillbirth to 2008).

| <b>Exposure</b>                    | <b>Outcome</b>               | <b>Odds Ratio</b> | <b>95% Confidence Interval</b> |      | <b>p-value</b> | <b>N</b> |
|------------------------------------|------------------------------|-------------------|--------------------------------|------|----------------|----------|
| Facility delivery (of index birth) | Direct maternal mortality    | 1.36              | 0.81                           | 2.28 | 0.243          | 89,365   |
|                                    | Perinatal mortality          | 1.67              | 1.56                           | 1.80 | <0.001         | 94,589   |
|                                    | Early neonatal mortality     | 1.43              | 1.29                           | 1.58 | <0.001         | 91,860   |
|                                    | First-day neonatal mortality | 1.44              | 1.26                           | 1.66 | <0.001         | 91,860   |
|                                    | Stillbirth                   | 1.81              | 1.65                           | 1.98 | <0.001         | 94,684   |
|                                    | Antepartum stillbirth        | 1.89              | 1.64                           | 2.16 | <0.001         | 78,424   |
|                                    | Intrapartum stillbirth       | 1.68              | 1.44                           | 1.95 | <0.001         | 78,424   |

**Table A2: Crude associations of cluster-level facility birth, wealth, education and distances with nine health service use and mortality outcomes**

Each line of results comes from a separate regression model of an exposure on an outcome, using surveillance data from 2000 to 2009 (for antepartum and intrapartum stillbirth from 2003-2008, for maternal mortality from 2000-2008).

| Exposure                                        | Outcome                      | Odds Ratio | 95% Confidence Interval |      | p-value | N       |
|-------------------------------------------------|------------------------------|------------|-------------------------|------|---------|---------|
| Cluster-level facility birth (per 20% increase) | Facility birth               | 2.36       | 2.30                    | 2.41 | <0.001  | 98,084  |
|                                                 | Caesarean section            | 1.39       | 1.34                    | 1.45 | <0.001  | 93,610  |
|                                                 | Direct maternal mortality    | 1.13       | 1.02                    | 1.26 | 0.025   | 86,607  |
|                                                 | Perinatal mortality          | 1.00       | 0.98                    | 1.02 | 0.976   | 98,141  |
|                                                 | Early neonatal mortality     | 1.02       | 0.99                    | 1.05 | 0.204   | 95,262  |
|                                                 | First-day neonatal mortality | 1.04       | 1.00                    | 1.08 | 0.042   | 95,262  |
|                                                 | Stillbirth                   | 0.98       | 0.96                    | 1.01 | 0.241   | 98,236  |
|                                                 | Antepartum stillbirth        | 0.99       | 0.95                    | 1.04 | 0.688   | 77,786  |
|                                                 | Intrapartum stillbirth       | 0.96       | 0.91                    | 1.01 | 0.079   | 77,786  |
| Household wealth (per quintile)                 | Facility birth               | 1.75       | 1.72                    | 1.77 | <0.001  | 105,026 |
|                                                 | Caesarean section            | 1.36       | 1.33                    | 1.40 | <0.001  | 94,719  |
|                                                 | Direct maternal mortality    | 1.18       | 1.04                    | 1.34 | 0.013   | 93,620  |
|                                                 | Perinatal mortality          | 1.02       | 1.00                    | 1.04 | 0.080   | 105,197 |
|                                                 | Early neonatal mortality     | 1.03       | 1.00                    | 1.07 | 0.035   | 102,146 |
|                                                 | First-day neonatal mortality | 1.05       | 1.01                    | 1.09 | 0.019   | 102,146 |
|                                                 | Stillbirth                   | 1.01       | 0.98                    | 1.03 | 0.659   | 105,292 |
|                                                 | Antepartum stillbirth        | 1.04       | 0.99                    | 1.08 | 0.097   | 78,702  |
|                                                 | Intrapartum stillbirth       | 0.95       | 0.90                    | 1.00 | 0.034   | 78,702  |
| Mother's education (per level)                  | Facility birth               | 1.66       | 1.63                    | 1.69 | <0.001  | 105,423 |
|                                                 | Caesarean section            | 1.39       | 1.35                    | 1.44 | <0.001  | 95,028  |
|                                                 | Direct maternal mortality    | 0.88       | 0.76                    | 1.02 | 0.093   | 94,059  |
|                                                 | Perinatal mortality          | 1.02       | 0.99                    | 1.05 | 0.132   | 105,638 |



|                                                     |                              |      |      |      |        |         |
|-----------------------------------------------------|------------------------------|------|------|------|--------|---------|
|                                                     | Early neonatal mortality     | 1.06 | 1.02 | 1.11 | 0.003  | 102,563 |
|                                                     | First-day neonatal mortality | 1.11 | 1.05 | 1.17 | <0.001 | 102,563 |
|                                                     | Stillbirth                   | 0.99 | 0.95 | 1.02 | 0.437  | 105,733 |
|                                                     | Antepartum stillbirth        | 1.01 | 0.95 | 1.06 | 0.833  | 78,869  |
|                                                     | Intrapartum stillbirth       | 0.93 | 0.87 | 1.00 | 0.045  | 78,869  |
| Distance (logarithmic) to closest facility offering |                              |      |      |      |        |         |
| Any childbirth care                                 | Facility birth               | 0.54 | 0.53 | 0.56 | <0.001 | 113,125 |
|                                                     | Caesarean section            | 0.80 | 0.77 | 0.84 | <0.001 | 95,397  |
|                                                     | Direct maternal mortality    | 0.87 | 0.78 | 0.96 | 0.007  | 102,853 |
|                                                     | Perinatal mortality          | 0.98 | 0.96 | 1.01 | 0.150  | 113,452 |
|                                                     | Early neonatal mortality     | 0.97 | 0.94 | 1.00 | 0.076  | 110,161 |
|                                                     | First-day neonatal mortality | 0.95 | 0.91 | 0.99 | 0.012  | 110,161 |
|                                                     | Stillbirth                   | 0.99 | 0.97 | 1.02 | 0.652  | 113,547 |
|                                                     | Antepartum stillbirth        | 0.99 | 0.94 | 1.04 | 0.611  | 79,398  |
|                                                     | Intrapartum stillbirth       | 1.05 | 0.99 | 1.11 | 0.080  | 79,398  |
| Comprehensive Emergency Obstetric Care              | Facility birth               | 0.55 | 0.53 | 0.57 | <0.001 | 113,125 |
|                                                     | Caesarean section            | 0.68 | 0.66 | 0.71 | <0.001 | 95,397  |
|                                                     | Direct maternal mortality    | 0.95 | 0.87 | 1.04 | 0.286  | 102,853 |
|                                                     | Perinatal mortality          | 1.01 | 0.99 | 1.03 | 0.386  | 113,452 |
|                                                     | Early neonatal mortality     | 0.99 | 0.95 | 1.02 | 0.363  | 110,161 |
|                                                     | First-day neonatal mortality | 0.98 | 0.94 | 1.01 | 0.228  | 110,161 |
|                                                     | Stillbirth                   | 1.03 | 1.00 | 1.06 | 0.064  | 113,547 |
|                                                     | Antepartum stillbirth        | 0.98 | 0.93 | 1.03 | 0.330  | 79,398  |
|                                                     | Intrapartum stillbirth       | 1.13 | 1.07 | 1.20 | <0.001 | 79,398  |
| Emergency Newborn Care                              | Facility birth               | 0.66 | 0.63 | 0.68 | <0.001 | 113,125 |
|                                                     | Caesarean section            | 0.73 | 0.70 | 0.76 | <0.001 | 95,397  |

|                           |                              |      |      |      |        |         |
|---------------------------|------------------------------|------|------|------|--------|---------|
|                           | Direct maternal mortality    | 0.94 | 0.85 | 1.04 | 0.241  | 102,853 |
|                           | Perinatal mortality          | 1.02 | 0.99 | 1.04 | 0.183  | 113,452 |
|                           | Early neonatal mortality     | 0.99 | 0.96 | 1.03 | 0.626  | 110,161 |
|                           | First-day neonatal mortality | 1.00 | 0.96 | 1.04 | 0.944  | 110,161 |
|                           | Stillbirth                   | 1.04 | 1.01 | 1.07 | 0.014  | 113,547 |
|                           | Antepartum stillbirth        | 1.01 | 0.96 | 1.06 | 0.807  | 79,398  |
|                           | Intrapartum stillbirth       | 1.12 | 1.06 | 1.18 | <0.001 | 79,398  |
| High-quality routine care | Facility birth               | 0.56 | 0.54 | 0.58 | <0.001 | 113,125 |
|                           | Caesarean section            | 0.71 | 0.68 | 0.74 | <0.001 | 95,397  |
|                           | Direct maternal mortality    | 0.92 | 0.84 | 1.02 | 0.108  | 102,853 |
|                           | Perinatal mortality          | 1.00 | 0.98 | 1.02 | 0.958  | 113,452 |
|                           | Early neonatal mortality     | 0.97 | 0.94 | 1.00 | 0.061  | 110,161 |
|                           | First-day neonatal mortality | 0.96 | 0.92 | 1.00 | 0.027  | 110,161 |
|                           | Stillbirth                   | 1.02 | 0.99 | 1.05 | 0.218  | 113,547 |
|                           | Antepartum stillbirth        | 0.98 | 0.93 | 1.03 | 0.403  | 79,398  |
|                           | Intrapartum stillbirth       | 1.09 | 1.03 | 1.15 | 0.003  | 79,398  |
| Vignette score >12        | Facility birth               | 0.61 | 0.59 | 0.63 | <0.001 | 113,125 |
|                           | Caesarean section            | 0.71 | 0.68 | 0.74 | <0.001 | 95,397  |
|                           | Direct maternal mortality    | 0.96 | 0.87 | 1.05 | 0.356  | 102,853 |
|                           | Perinatal mortality          | 1.01 | 0.98 | 1.03 | 0.568  | 113,452 |
|                           | Early neonatal mortality     | 0.98 | 0.95 | 1.01 | 0.107  | 110,161 |
|                           | First-day neonatal mortality | 0.97 | 0.93 | 1.00 | 0.062  | 110,161 |
|                           | Stillbirth                   | 1.03 | 1.00 | 1.06 | 0.039  | 113,547 |
|                           | Antepartum stillbirth        | 0.97 | 0.92 | 1.02 | 0.205  | 79,398  |
|                           | Intrapartum stillbirth       | 1.13 | 1.07 | 1.19 | <0.001 | 79,398  |

**Table A3: Adjusted associations of cluster-level facility birth, wealth, education and distances with nine health service use and mortality outcomes (underlying Figures 2 and 3)**

Each line of results comes from a separate regression model of an exposure on an outcome, adjusting for confounders as specified in the methods section, using surveillance data from 2003 (for maternal mortality from 2000) to 2009 (for maternal mortality, antepartum and intrapartum stillbirth to 2008).

| Exposure                                        | Outcome                      | Odds Ratio | 95% Confidence Interval |      | p-value | N      |
|-------------------------------------------------|------------------------------|------------|-------------------------|------|---------|--------|
| Cluster-level facility birth (per 20% increase) | Facility birth               | 1.82       | 1.77                    | 1.87 | <0.001  | 93,141 |
|                                                 | Caesarean section            | 1.16       | 1.12                    | 1.21 | <0.001  | 92,730 |
|                                                 | Direct maternal mortality    | 1.10       | 0.94                    | 1.28 | 0.235   | 94,224 |
|                                                 | Perinatal mortality          | 0.98       | 0.95                    | 1.01 | 0.120   | 93,164 |
|                                                 | Early neonatal mortality     | 0.99       | 0.95                    | 1.03 | 0.716   | 90,434 |
|                                                 | First-day neonatal mortality | 1.00       | 0.95                    | 1.05 | 0.986   | 90,434 |
|                                                 | Stillbirth                   | 0.97       | 0.94                    | 1.00 | 0.075   | 93,259 |
|                                                 | Antepartum stillbirth        | 0.96       | 0.91                    | 1.01 | 0.127   | 76,992 |
|                                                 | Intrapartum stillbirth       | 0.96       | 0.90                    | 1.02 | 0.176   | 76,992 |
| Household wealth (per quintile)                 | Facility birth               | 1.45       | 1.42                    | 1.47 | <0.001  | 94,684 |
|                                                 | Caesarean section            | 1.13       | 1.09                    | 1.16 | <0.001  | 94,183 |
|                                                 | Direct maternal mortality    | 1.16       | 0.97                    | 1.38 | 0.098   | 94,224 |
|                                                 | Perinatal mortality          | 1.01       | 0.99                    | 1.04 | 0.349   | 94,708 |
|                                                 | Early neonatal mortality     | 1.00       | 0.96                    | 1.05 | 0.837   | 91,945 |
|                                                 | First-day neonatal mortality | 1.00       | 0.95                    | 1.06 | 0.962   | 91,945 |
|                                                 | Stillbirth                   | 1.02       | 0.98                    | 1.06 | 0.358   | 94,803 |
|                                                 | Antepartum stillbirth        | 1.02       | 0.97                    | 1.08 | 0.462   | 78,530 |
|                                                 | Intrapartum stillbirth       | 1.00       | 0.94                    | 1.07 | 0.973   | 78,530 |
| Mother's education (per level)                  | Facility birth               | 1.24       | 1.21                    | 1.27 | <0.001  | 94,684 |
|                                                 | Caesarean section            | 1.13       | 1.09                    | 1.18 | <0.001  | 94,183 |
|                                                 | Direct maternal mortality    | 0.69       | 0.56                    | 0.85 | <0.001  | 94,224 |

|                                                     |                              |      |      |      |        |        |
|-----------------------------------------------------|------------------------------|------|------|------|--------|--------|
|                                                     | Perinatal mortality          | 0.96 | 0.93 | 1.00 | 0.039  | 94,708 |
|                                                     | Early neonatal mortality     | 0.99 | 0.93 | 1.04 | 0.652  | 91,945 |
|                                                     | First-day neonatal mortality | 1.07 | 0.99 | 1.15 | 0.078  | 91,945 |
|                                                     | Stillbirth                   | 0.94 | 0.89 | 0.98 | 0.010  | 94,803 |
|                                                     | Antepartum stillbirth        | 0.94 | 0.87 | 1.01 | 0.078  | 78,530 |
|                                                     | Intrapartum stillbirth       | 0.94 | 0.87 | 1.03 | 0.190  | 78,530 |
| Distance (logarithmic) to closest facility offering |                              |      |      |      |        |        |
| Any childbirth care                                 | Facility birth               | 0.62 | 0.60 | 0.64 | <0.001 | 94,684 |
|                                                     | Caesarean section            | 0.90 | 0.87 | 0.94 | <0.001 | 94,183 |
|                                                     | Direct maternal mortality    | 0.88 | 0.78 | 1.00 | 0.042  | 94,224 |
|                                                     | Perinatal mortality          | 1.00 | 0.97 | 1.03 | 0.992  | 94,708 |
|                                                     | Early neonatal mortality     | 0.99 | 0.95 | 1.03 | 0.611  | 91,945 |
|                                                     | First-day neonatal mortality | 0.97 | 0.93 | 1.02 | 0.273  | 91,945 |
|                                                     | Stillbirth                   | 1.01 | 0.97 | 1.04 | 0.716  | 94,803 |
|                                                     | Antepartum stillbirth        | 1.01 | 0.96 | 1.06 | 0.666  | 78,530 |
|                                                     | Intrapartum stillbirth       | 1.03 | 0.98 | 1.09 | 0.251  | 78,530 |
| Comprehensive Emergency Obstetric Care              | Facility birth               | 0.69 | 0.67 | 0.72 | <0.001 | 94,684 |
|                                                     | Caesarean section            | 0.80 | 0.77 | 0.83 | <0.001 | 94,183 |
|                                                     | Direct maternal mortality    | 1.01 | 0.89 | 1.15 | 0.871  | 94,224 |
|                                                     | Perinatal mortality          | 1.04 | 1.01 | 1.07 | 0.006  | 94,708 |
|                                                     | Early neonatal mortality     | 1.02 | 0.98 | 1.06 | 0.389  | 91,945 |
|                                                     | First-day neonatal mortality | 1.01 | 0.96 | 1.06 | 0.717  | 91,945 |
|                                                     | Stillbirth                   | 1.06 | 1.02 | 1.09 | 0.003  | 94,803 |
|                                                     | Antepartum stillbirth        | 1.02 | 0.96 | 1.08 | 0.481  | 78,530 |
|                                                     | Intrapartum stillbirth       | 1.13 | 1.06 | 1.21 | <0.001 | 78,530 |
| Emergency Newborn Care                              | Facility birth               | 0.79 | 0.76 | 0.82 | <0.001 | 94,684 |

|                           |                              |      |      |      |        |        |
|---------------------------|------------------------------|------|------|------|--------|--------|
|                           | Caesarean section            | 0.85 | 0.81 | 0.88 | <0.001 | 94,183 |
|                           | Direct maternal mortality    | 0.99 | 0.88 | 1.12 | 0.926  | 94,224 |
|                           | Perinatal mortality          | 1.05 | 1.03 | 1.08 | <0.001 | 94,708 |
|                           | Early neonatal mortality     | 1.03 | 0.99 | 1.06 | 0.152  | 91,945 |
|                           | First-day neonatal mortality | 1.03 | 0.99 | 1.08 | 0.169  | 91,945 |
|                           | Stillbirth                   | 1.07 | 1.04 | 1.10 | <0.001 | 94,803 |
|                           | Antepartum stillbirth        | 1.06 | 1.01 | 1.12 | 0.024  | 78,530 |
|                           | Intrapartum stillbirth       | 1.10 | 1.03 | 1.17 | 0.002  | 78,530 |
| High-quality routine care | Facility birth               | 0.69 | 0.66 | 0.71 | <0.001 | 94,684 |
|                           | Caesarean section            | 0.83 | 0.79 | 0.86 | <0.001 | 94,183 |
|                           | Direct maternal mortality    | 0.99 | 0.87 | 1.12 | 0.814  | 94,224 |
|                           | Perinatal mortality          | 1.02 | 1.00 | 1.05 | 0.105  | 94,708 |
|                           | Early neonatal mortality     | 1.00 | 0.96 | 1.03 | 0.804  | 91,945 |
|                           | First-day neonatal mortality | 0.98 | 0.94 | 1.03 | 0.433  | 91,945 |
|                           | Stillbirth                   | 1.04 | 1.00 | 1.07 | 0.040  | 94,803 |
|                           | Antepartum stillbirth        | 1.02 | 0.97 | 1.08 | 0.370  | 78,530 |
|                           | Intrapartum stillbirth       | 1.07 | 1.01 | 1.14 | 0.027  | 78,530 |
| Vignette score >12        | Facility birth               | 0.74 | 0.71 | 0.76 | <0.001 | 94,684 |
|                           | Caesarean section            | 0.80 | 0.77 | 0.84 | <0.001 | 94,183 |
|                           | Direct maternal mortality    | 1.02 | 0.90 | 1.15 | 0.771  | 94,224 |
|                           | Perinatal mortality          | 1.03 | 1.00 | 1.06 | 0.027  | 94,708 |
|                           | Early neonatal mortality     | 1.01 | 0.97 | 1.05 | 0.724  | 91,945 |
|                           | First-day neonatal mortality | 1.00 | 0.95 | 1.05 | 0.916  | 91,945 |
|                           | Stillbirth                   | 1.05 | 1.01 | 1.08 | 0.008  | 94,803 |
|                           | Antepartum stillbirth        | 1.01 | 0.95 | 1.06 | 0.811  | 78,530 |
|                           | Intrapartum stillbirth       | 1.12 | 1.05 | 1.19 | <0.001 | 78,530 |

**Table A4: Interaction of time period with cluster-level facility birth, wealth, education and distances in their effect on four mortality outcomes (underlying Figure 4)**

Each Odds Ratio (OR) and 95% Confidence Interval (CI) come from a separate regression model of an exposure on an outcome, with an interaction term for time period. The main effects are shown stratified by time period (calculated using the interaction terms) as well as the interaction p-values. Models are adjusted for confounders as specified in the methods section and based on surveillance data from 2003 to 2009.

| Exposure                                                                   | Outcome                      | N     | Time period 6/2003 - 3/2005 |        |         |        | Time period 4/2005 - 06/2008 |         |         |        | interaction | Time period 07/2008 - 12/2009 |         |      |       | interaction |
|----------------------------------------------------------------------------|------------------------------|-------|-----------------------------|--------|---------|--------|------------------------------|---------|---------|--------|-------------|-------------------------------|---------|------|-------|-------------|
|                                                                            |                              |       | OR                          | 95% CI | p-value | OR     | 95% CI                       | p-value | p-value | OR     | 95% CI      | p-value                       | p-value |      |       |             |
| Cluster-level facility birth(per 20% increase)                             | Perinatal mortality          | 93164 | 0.96                        | 0.92   | 1.00    | 0.051  | 0.97                         | 0.93    | 1.00    | 0.034  | 0.819       | 1.05                          | 1.00    | 1.11 | 0.045 | 0.003       |
|                                                                            | Early neonatal mortality     | 90434 | 0.99                        | 0.93   | 1.05    | 0.701  | 0.97                         | 0.93    | 1.02    | 0.287  | 0.698       | 1.06                          | 0.99    | 1.15 | 0.112 | 0.117       |
|                                                                            | First-day neonatal mortality | 90434 | 0.94                        | 0.86   | 1.02    | 0.130  | 0.99                         | 0.93    | 1.05    | 0.773  | 0.245       | 1.12                          | 1.02    | 1.24 | 0.019 | 0.003       |
|                                                                            | Stillbirth                   | 93259 | 0.95                        | 0.90   | 1.00    | 0.038  | 0.96                         | 0.92    | 1.00    | 0.058  | 0.642       | 1.04                          | 0.97    | 1.11 | 0.264 | 0.020       |
| Household wealth (per quintile)                                            | Perinatal mortality          | 94708 | 0.99                        | 0.94   | 1.03    | 0.571  | 1.00                         | 0.97    | 1.04    | 0.891  | 0.534       | 1.09                          | 1.03    | 1.14 | 0.001 | 0.002       |
|                                                                            | Early neonatal mortality     | 91945 | 0.99                        | 0.92   | 1.06    | 0.686  | 0.98                         | 0.93    | 1.03    | 0.492  | 0.920       | 1.10                          | 1.02    | 1.19 | 0.013 | 0.020       |
|                                                                            | First-day neonatal mortality | 91945 | 0.92                        | 0.84   | 1.02    | 0.099  | 1.00                         | 0.93    | 1.07    | 0.929  | 0.139       | 1.10                          | 1.00    | 1.21 | 0.058 | 0.006       |
|                                                                            | Stillbirth                   | 94803 | 0.99                        | 0.93   | 1.05    | 0.668  | 1.01                         | 0.97    | 1.06    | 0.520  | 0.392       | 1.07                          | 1.00    | 1.14 | 0.048 | 0.050       |
| Mother's education (per level)                                             | Perinatal mortality          | 94708 | 0.93                        | 0.88   | 0.99    | 0.027  | 0.97                         | 0.93    | 1.02    | 0.224  | 0.253       | 0.97                          | 0.91    | 1.04 | 0.403 | 0.374       |
|                                                                            | Early neonatal mortality     | 91945 | 0.98                        | 0.89   | 1.08    | 0.688  | 1.00                         | 0.93    | 1.07    | 0.961  | 0.744       | 0.97                          | 0.87    | 1.07 | 0.525 | 0.826       |
|                                                                            | First-day neonatal mortality | 91945 | 1.08                        | 0.95   | 1.23    | 0.223  | 1.09                         | 0.99    | 1.19    | 0.075  | 0.963       | 1.02                          | 0.89    | 1.16 | 0.798 | 0.476       |
|                                                                            | Stillbirth                   | 94803 | 0.90                        | 0.83   | 0.97    | 0.008  | 0.95                         | 0.89    | 1.01    | 0.073  | 0.270       | 0.97                          | 0.88    | 1.06 | 0.468 | 0.208       |
| Distance (logarithmic) to closest facility offering<br>Any childbirth care | Perinatal mortality          | 94708 | 1.01                        | 0.97   | 1.05    | 0.655  | 1.02                         | 0.99    | 1.06    | 0.172  | 0.599       | 0.93                          | 0.89    | 0.98 | 0.007 | 0.014       |
|                                                                            | Early neonatal mortality     | 91945 | 0.99                        | 0.93   | 1.06    | 0.800  | 1.01                         | 0.97    | 1.06    | 0.612  | 0.590       | 0.94                          | 0.87    | 1.01 | 0.078 | 0.226       |
|                                                                            | First-day neonatal mortality | 91945 | 1.02                        | 0.94   | 1.12    | 0.587  | 0.99                         | 0.93    | 1.05    | 0.628  | 0.447       | 0.89                          | 0.81    | 0.98 | 0.016 | 0.028       |
|                                                                            | Stillbirth                   | 94803 | 1.02                        | 0.96   | 1.07    | 0.547  | 1.03                         | 0.99    | 1.07    | 0.205  | 0.739       | 0.94                          | 0.88    | 1.00 | 0.051 | 0.049       |
| Comprehensive Emergency Obstetric Care                                     | Perinatal mortality          | 94708 | 1.07                        | 1.02   | 1.11    | 0.004  | 1.05                         | 1.02    | 1.09    | 0.004  | 0.541       | 0.98                          | 0.94    | 1.03 | 0.502 | 0.007       |
|                                                                            | Early neonatal mortality     | 91945 | 1.04                        | 0.97   | 1.10    | 0.282  | 1.03                         | 0.98    | 1.08    | 0.224  | 0.895       | 0.97                          | 0.90    | 1.04 | 0.346 | 0.125       |
|                                                                            | First-day neonatal mortality | 91945 | 1.05                        | 0.97   | 1.15    | 0.235  | 1.01                         | 0.95    | 1.07    | 0.701  | 0.410       | 0.96                          | 0.88    | 1.04 | 0.304 | 0.094       |
|                                                                            | Stillbirth                   | 94803 | 1.08                        | 1.02   | 1.14    | 0.006  | 1.07                         | 1.02    | 1.11    | 0.005  | 0.635       | 1.00                          | 0.94    | 1.06 | 0.975 | 0.043       |
| Emergency Newborn Care                                                     | Perinatal mortality          | 94708 | 1.09                        | 1.05   | 1.14    | <0.001 | 1.07                         | 1.03    | 1.10    | <0.001 | 0.389       | 0.96                          | 0.92    | 1.01 | 0.106 | <0.001      |
|                                                                            | Early neonatal mortality     | 91945 | 1.05                        | 0.99   | 1.12    | 0.131  | 1.07                         | 1.02    | 1.12    | 0.005  | 0.655       | 0.90                          | 0.84    | 0.96 | 0.003 | <0.001      |
|                                                                            | First-day neonatal mortality | 91945 | 1.08                        | 0.99   | 1.19    | 0.086  | 1.07                         | 1.01    | 1.14    | 0.023  | 0.885       | 0.90                          | 0.82    | 0.98 | 0.018 | 0.003       |
|                                                                            | Stillbirth                   | 94803 | 1.11                        | 1.05   | 1.17    | <0.001 | 1.07                         | 1.02    | 1.11    | 0.002  | 0.215       | 1.02                          | 0.95    | 1.08 | 0.643 | 0.030       |
| High-quality routine care                                                  | Perinatal mortality          | 94708 | 1.06                        | 1.02   | 1.11    | 0.008  | 1.02                         | 0.99    | 1.06    | 0.169  | 0.154       | 0.97                          | 0.93    | 1.02 | 0.287 | 0.006       |
|                                                                            | Early neonatal mortality     | 91945 | 1.00                        | 0.94   | 1.06    | 0.998  | 1.01                         | 0.96    | 1.06    | 0.787  | 0.860       | 0.96                          | 0.90    | 1.03 | 0.293 | 0.408       |
|                                                                            | First-day neonatal mortality | 91945 | 1.01                        | 0.93   | 1.10    | 0.832  | 0.98                         | 0.93    | 1.04    | 0.599  | 0.614       | 0.94                          | 0.86    | 1.03 | 0.197 | 0.261       |
|                                                                            | Stillbirth                   | 94803 | 1.09                        | 1.03   | 1.15    | 0.002  | 1.03                         | 0.99    | 1.07    | 0.187  | 0.067       | 0.98                          | 0.92    | 1.05 | 0.586 | 0.009       |
| Vignette score >12                                                         | Perinatal mortality          | 94708 | 1.04                        | 1.00   | 1.09    | 0.055  | 1.04                         | 1.01    | 1.08    | 0.013  | 0.965       | 0.99                          | 0.94    | 1.04 | 0.663 | 0.086       |
|                                                                            | Early neonatal mortality     | 91945 | 1.01                        | 0.95   | 1.07    | 0.798  | 1.02                         | 0.98    | 1.07    | 0.335  | 0.669       | 0.97                          | 0.90    | 1.04 | 0.334 | 0.343       |
|                                                                            | First-day neonatal mortality | 91945 | 1.03                        | 0.95   | 1.12    | 0.429  | 1.00                         | 0.94    | 1.06    | 0.983  | 0.477       | 0.95                          | 0.87    | 1.04 | 0.263 | 0.153       |
|                                                                            | Stillbirth                   | 94803 | 1.06                        | 1.00   | 1.11    | 0.039  | 1.06                         | 1.01    | 1.10    | 0.010  | 1.000       | 1.01                          | 0.95    | 1.07 | 0.753 | 0.235       |

### 3. Sensitivity analyses

#### 1) Crude analysis in restricted sample

Multivariable analyses were performed in a restricted sample, including only observations from 2003 (for all outcomes except maternal mortality) and observations without missing values in the adjustment variables (99% after 2003). To rule out bias by complete case analysis and by restricting to observations after 2003, additional crude analyses were performed in the restricted sample used for adjusted analyses, and results were compared with results of the crude analysis in the complete sample.

Results from crude analyses in the restricted sample used for adjusted analyses (Table A5) were similar to those in the full sample (compare Table A2).

**Table A5: Crude associations of cluster-level facility birth, wealth, education and distances with nine health service use and mortality outcomes (in the subset of observations used for adjusted analyses in Table A3)**

Each line of results comes from a separate regression model of an exposure on an outcome, using surveillance data from 2000 to 2009 (for antepartum and intrapartum stillbirth from 2003-2008, for maternal mortality from 2000-2008)

| Exposure                                        | Outcome                      | Odds Ratio | 95% Confidence Interval |      | p-value | N      |
|-------------------------------------------------|------------------------------|------------|-------------------------|------|---------|--------|
| Cluster-level facility birth (per 20% increase) | Facility birth               | 2.34       | 2.29                    | 2.40 | <0.001  | 93,141 |
|                                                 | Caesarean section            | 1.40       | 1.34                    | 1.45 | <0.001  | 92,730 |
|                                                 | Direct maternal mortality    | 1.13       | 0.97                    | 1.32 | 0.107   | 80,945 |
|                                                 | Perinatal mortality          | 1.00       | 0.97                    | 1.02 | 0.706   | 93,164 |
|                                                 | Early neonatal mortality     | 1.02       | 0.98                    | 1.05 | 0.331   | 90,434 |
|                                                 | First-day neonatal mortality | 1.04       | 1.00                    | 1.08 | 0.069   | 90,434 |
|                                                 | Stillbirth                   | 0.98       | 0.95                    | 1.01 | 0.134   | 93,259 |
|                                                 | Antepartum stillbirth        | 0.99       | 0.95                    | 1.03 | 0.595   | 76,992 |
|                                                 | Intrapartum stillbirth       | 0.95       | 0.90                    | 1.00 | 0.046   | 76,992 |
| Household wealth (per quintile)                 | Facility birth               | 1.77       | 1.74                    | 1.80 | <0.001  | 94,684 |
|                                                 | Caesarean section            | 1.36       | 1.33                    | 1.40 | <0.001  | 94,183 |
|                                                 | Direct maternal mortality    | 1.12       | 0.98                    | 1.29 | 0.105   | 82,546 |
|                                                 | Perinatal mortality          | 1.02       | 0.99                    | 1.04 | 0.175   | 94,708 |
|                                                 | Early neonatal mortality     | 1.03       | 1.00                    | 1.06 | 0.088   | 91,945 |
|                                                 | First-day neonatal mortality | 1.05       | 1.01                    | 1.09 | 0.021   | 91,945 |
|                                                 | Stillbirth                   | 1.00       | 0.97                    | 1.03 | 0.923   | 94,803 |

|                                                     |                              |      |      |      |        |        |
|-----------------------------------------------------|------------------------------|------|------|------|--------|--------|
|                                                     | Antepartum stillbirth        | 1.04 | 0.99 | 1.08 | 0.097  | 78,530 |
|                                                     | Intrapartum stillbirth       | 0.95 | 0.90 | 0.99 | 0.029  | 78,530 |
| Mother's education (per level)                      | Facility birth               | 1.67 | 1.64 | 1.70 | <0.001 | 94,684 |
|                                                     | Caesarean section            | 1.39 | 1.35 | 1.44 | <0.001 | 94,183 |
|                                                     | Direct maternal mortality    | 0.95 | 0.79 | 1.16 | 0.641  | 82,546 |
|                                                     | Perinatal mortality          | 1.01 | 0.98 | 1.04 | 0.436  | 94,708 |
|                                                     | Early neonatal mortality     | 1.05 | 1.01 | 1.10 | 0.022  | 91,945 |
|                                                     | First-day neonatal mortality | 1.11 | 1.05 | 1.17 | <0.001 | 91,945 |
|                                                     | Stillbirth                   | 0.98 | 0.94 | 1.01 | 0.235  | 94,803 |
|                                                     | Antepartum stillbirth        | 1.01 | 0.95 | 1.07 | 0.788  | 78,530 |
|                                                     | Intrapartum stillbirth       | 0.93 | 0.87 | 1.00 | 0.037  | 78,530 |
| Distance (logarithmic) to closest facility offering |                              |      |      |      |        |        |
| Any childbirth care                                 | Facility birth               | 0.54 | 0.52 | 0.55 | <0.001 | 94,684 |
|                                                     | Caesarean section            | 0.80 | 0.76 | 0.83 | <0.001 | 94,183 |
|                                                     | Direct maternal mortality    | 0.83 | 0.71 | 0.97 | 0.020  | 82,546 |
|                                                     | Perinatal mortality          | 0.99 | 0.97 | 1.01 | 0.462  | 94,708 |
|                                                     | Early neonatal mortality     | 0.98 | 0.95 | 1.01 | 0.176  | 91,945 |
|                                                     | First-day neonatal mortality | 0.96 | 0.92 | 1.00 | 0.038  | 91,945 |
|                                                     | Stillbirth                   | 1.00 | 0.97 | 1.03 | 0.844  | 94,803 |
|                                                     | Antepartum stillbirth        | 0.99 | 0.94 | 1.03 | 0.599  | 78,530 |
|                                                     | Intrapartum stillbirth       | 1.05 | 1.00 | 1.11 | 0.060  | 78,530 |
| Comprehensive Emergency Obstetric Care              | Facility birth               | 0.56 | 0.54 | 0.58 | <0.001 | 94,684 |
|                                                     | Caesarean section            | 0.68 | 0.65 | 0.71 | <0.001 | 94,183 |
|                                                     | Direct maternal mortality    | 0.91 | 0.78 | 1.06 | 0.216  | 82,546 |
|                                                     | Perinatal mortality          | 1.02 | 0.99 | 1.04 | 0.157  | 94,708 |
|                                                     | Early neonatal mortality     | 1.00 | 0.97 | 1.03 | 0.862  | 91,945 |



|                           |                              |      |      |      |        |        |
|---------------------------|------------------------------|------|------|------|--------|--------|
|                           | First-day neonatal mortality | 0.98 | 0.94 | 1.02 | 0.327  | 91,945 |
|                           | Stillbirth                   | 1.03 | 1.00 | 1.06 | 0.033  | 94,803 |
|                           | Antepartum stillbirth        | 0.98 | 0.94 | 1.03 | 0.512  | 78,530 |
|                           | Intrapartum stillbirth       | 1.13 | 1.07 | 1.20 | <0.001 | 78,530 |
|                           |                              |      |      |      | <0.001 |        |
| Emergency Newborn Care    | Facility birth               | 0.65 | 0.63 | 0.68 | <0.001 | 94,684 |
|                           | Caesarean section            | 0.73 | 0.70 | 0.76 | <0.001 | 94,183 |
|                           | Direct maternal mortality    | 0.94 | 0.81 | 1.09 | 0.438  | 82,546 |
|                           | Perinatal mortality          | 1.03 | 1.00 | 1.05 | 0.028  | 94,708 |
|                           | Early neonatal mortality     | 1.00 | 0.97 | 1.04 | 0.803  | 91,945 |
|                           | First-day neonatal mortality | 1.01 | 0.97 | 1.05 | 0.699  | 91,945 |
|                           | Stillbirth                   | 1.05 | 1.02 | 1.08 | <0.001 | 94,803 |
|                           | Antepartum stillbirth        | 1.01 | 0.97 | 1.07 | 0.580  | 78,530 |
|                           | Intrapartum stillbirth       | 1.12 | 1.06 | 1.18 | <0.001 | 78,530 |
|                           |                              |      |      |      |        |        |
| High-quality routine care | Facility birth               | 0.56 | 0.54 | 0.58 | <0.001 | 94,684 |
|                           | Caesarean section            | 0.71 | 0.68 | 0.74 | <0.001 | 94,183 |
|                           | Direct maternal mortality    | 0.87 | 0.75 | 1.01 | 0.061  | 82,546 |
|                           | Perinatal mortality          | 1.01 | 0.98 | 1.03 | 0.666  | 94,708 |
|                           | Early neonatal mortality     | 0.98 | 0.95 | 1.01 | 0.263  | 91,945 |
|                           | First-day neonatal mortality | 0.96 | 0.93 | 1.00 | 0.072  | 91,945 |
|                           | Stillbirth                   | 1.02 | 0.99 | 1.05 | 0.183  | 94,803 |
|                           | Antepartum stillbirth        | 0.99 | 0.94 | 1.03 | 0.555  | 78,530 |
|                           | Intrapartum stillbirth       | 1.09 | 1.03 | 1.15 | 0.002  | 78,530 |
|                           |                              |      |      |      |        |        |
| Vignette score >12        | Facility birth               | 0.61 | 0.59 | 0.63 | <0.001 | 94,684 |
|                           | Caesarean section            | 0.71 | 0.68 | 0.74 | <0.001 | 94,183 |
|                           | Direct maternal mortality    | 0.93 | 0.80 | 1.08 | 0.337  | 82,546 |
|                           | Perinatal mortality          | 1.01 | 0.99 | 1.04 | 0.267  | 94,708 |

|                              |      |      |      |        |        |
|------------------------------|------|------|------|--------|--------|
| Early neonatal mortality     | 0.99 | 0.96 | 1.02 | 0.599  | 91,945 |
| First-day neonatal mortality | 0.98 | 0.94 | 1.01 | 0.199  | 91,945 |
| Stillbirth                   | 1.03 | 1.00 | 1.06 | 0.047  | 94,803 |
| Antepartum stillbirth        | 0.98 | 0.93 | 1.03 | 0.346  | 78,530 |
| Intrapartum stillbirth       | 1.13 | 1.07 | 1.19 | <0.001 | 78,530 |

## 2) Road distance and travel time

We performed analyses using road distance and walking time in hours, calculated assuming a travel speed of 4 km per hour for travel along the road and a speed of 2 km per hour across land where no road was available (Nesbitt et al. 2014, ref. 39). For comparability with straight-line distance, both measures were also log-transformed.

Results when using road distance or walking time (Table A6) were similar to those using straight-line distance (compare Table A3).

**Table A6: Adjusted associations of two road distances and two walking-time measures with nine health service use and mortality outcomes**

Each line of results comes from a separate regression model of an exposure on an outcome, adjusting for confounders as specified in the methods section, using surveillance data from 2003 (for maternal mortality from 2000) to 2009 (for maternal mortality, antepartum and intrapartum stillbirth to 2008).

| Exposure                                                 | Outcome                      | Odds Ratio | 95% Confidence Interval |       | p-value | N      |
|----------------------------------------------------------|------------------------------|------------|-------------------------|-------|---------|--------|
| Road distance (logarithmic) to closest facility offering | Any childbirth care          |            |                         |       |         |        |
|                                                          | Facility birth               | 0.62       | 0.60                    | 0.64  | <0.001  | 94,684 |
|                                                          | Caesarean section            | 0.92       | 0.88                    | 0.96  | <0.001  | 94,183 |
|                                                          | Direct maternal mortality    | 0.90       | 0.79                    | 1.02  | 0.088   | 94,224 |
|                                                          | Perinatal mortality          | 0.99       | 0.97                    | 1.02  | 0.660   | 94,708 |
|                                                          | Early neonatal mortality     | 0.99       | 0.95                    | 1.03  | 0.581   | 91,945 |
|                                                          | First-day neonatal mortality | 0.97       | 0.93                    | 1.02  | 0.283   | 91,945 |
|                                                          | Stillbirth                   | 1.00       | 0.96                    | 1.03  | 0.847   | 94,803 |
|                                                          | Antepartum stillbirth        | 1.01       | 0.96                    | 1.06  | 0.730   | 78,530 |
| Intrapartum stillbirth                                   | 1.02                         | 0.96       | 1.08                    | 0.585 | 78,530  |        |
| Comprehensive Emergency Obstetric Care                   | Facility birth               | 0.69       | 0.67                    | 0.73  | <0.001  | 94,684 |
|                                                          | Caesarean section            | 0.78       | 0.74                    | 0.82  | <0.001  | 94,183 |
|                                                          | Direct maternal mortality    | 1.03       | 0.89                    | 1.19  | 0.697   | 94,224 |
|                                                          | Perinatal mortality          | 1.04       | 1.01                    | 1.07  | 0.022   | 94,708 |
|                                                          | Early neonatal mortality     | 1.02       | 0.97                    | 1.06  | 0.457   | 91,945 |
|                                                          | First-day neonatal mortality | 1.01       | 0.95                    | 1.06  | 0.837   | 91,945 |
|                                                          | Stillbirth                   | 1.05       | 1.01                    | 1.09  | 0.013   | 94,803 |
|                                                          | Antepartum stillbirth        | 1.02       | 0.96                    | 1.08  | 0.614   | 78,530 |
|                                                          | Intrapartum stillbirth       | 1.13       | 1.05                    | 1.21  | <0.001  | 78,530 |

|                                                      |                              |       |       |       |        |        |
|------------------------------------------------------|------------------------------|-------|-------|-------|--------|--------|
| Walking time (per hour) to closest facility offering |                              |       |       |       |        |        |
| Any childbirth care                                  | Facility birth               | 0.654 | 0.634 | 0.675 | <0.001 | 94,684 |
|                                                      | Caesarean section            | 0.882 | 0.844 | 0.922 | <0.001 | 94,183 |
|                                                      | Direct maternal mortality    | 0.926 | 0.810 | 1.058 | 0.258  | 94,224 |
|                                                      | Perinatal mortality          | 0.994 | 0.970 | 1.020 | 0.659  | 94,708 |
|                                                      | Early neonatal mortality     | 0.994 | 0.959 | 1.031 | 0.763  | 91,945 |
|                                                      | First-day neonatal mortality | 0.998 | 0.952 | 1.046 | 0.928  | 91,945 |
|                                                      | Stillbirth                   | 0.995 | 0.965 | 1.027 | 0.770  | 94,803 |
|                                                      | Antepartum stillbirth        | 1.006 | 0.958 | 1.057 | 0.806  | 78,530 |
|                                                      | Intrapartum stillbirth       | 1.017 | 0.965 | 1.072 | 0.533  | 78,530 |
| Comprehensive Emergency Obstetric Care               | Facility birth               | 0.958 | 0.947 | 0.968 | <0.001 | 94,684 |
|                                                      | Caesarean section            | 0.929 | 0.915 | 0.944 | <0.001 | 94,183 |
|                                                      | Direct maternal mortality    | 1.032 | 0.993 | 1.073 | 0.110  | 94,224 |
|                                                      | Perinatal mortality          | 1.010 | 1.002 | 1.018 | 0.020  | 94,708 |
|                                                      | Early neonatal mortality     | 1.007 | 0.995 | 1.019 | 0.267  | 91,945 |
|                                                      | First-day neonatal mortality | 1.001 | 0.985 | 1.016 | 0.950  | 91,945 |
|                                                      | Stillbirth                   | 1.012 | 1.002 | 1.023 | 0.024  | 94,803 |
|                                                      | Antepartum stillbirth        | 1.000 | 0.984 | 1.018 | 0.958  | 78,530 |
|                                                      | Intrapartum stillbirth       | 1.022 | 1.005 | 1.040 | 0.012  | 78,530 |

### 3) Restricted sample to women with good pregnancy surveillance

To assess possible (differential) under-reporting of deaths, we performed an analysis only including pregnancies that were recorded before delivery (100% in the *Newhints* trial) or with at least one surveillance visit during the last 3 months of pregnancy (97% in the *ObaapaVita* trial).

Results when excluding deliveries with suboptimal surveillance (Table A7) were similar to those in the full sample (compare Table A3).

**Table A7: Adjusted associations of cluster-level facility birth, wealth, education and distances with 8 health service use and mortality outcomes in the subset with good surveillance (pregnancy visit in 90 days before birth)**

Each line of results comes from a separate regression model of an exposure on an outcome, adjusting for confounders as specified in the methods section, using surveillance data from 2003 to 2009 (for antepartum and intrapartum stillbirth to 2008).

| Exposure                                        | Outcome                      | Odds Ratio | 95% Confidence Interval |      | p-value | N      |
|-------------------------------------------------|------------------------------|------------|-------------------------|------|---------|--------|
| Cluster-level facility birth (per 20% increase) | Facility birth               | 1.85       | 1.80                    | 1.90 | <0.001  | 90,388 |
|                                                 | Caesarean section            | 1.16       | 1.12                    | 1.21 | <0.001  | 89,988 |
|                                                 | Perinatal mortality          | 0.98       | 0.95                    | 1.00 | 0.091   | 90,407 |
|                                                 | Early neonatal mortality     | 0.99       | 0.95                    | 1.03 | 0.717   | 87,731 |
|                                                 | First-day neonatal mortality | 1.01       | 0.96                    | 1.06 | 0.779   | 87,731 |
|                                                 | Stillbirth                   | 0.97       | 0.93                    | 1.00 | 0.053   | 90,502 |
|                                                 | Antepartum stillbirth        | 0.96       | 0.91                    | 1.01 | 0.127   | 74,240 |
|                                                 | Intrapartum stillbirth       | 0.95       | 0.90                    | 1.01 | 0.100   | 74,240 |
| Household wealth (per quintile)                 | Facility birth               | 1.44       | 1.42                    | 1.47 | <0.001  | 91,905 |
|                                                 | Caesarean section            | 1.13       | 1.09                    | 1.16 | <0.001  | 91,415 |
|                                                 | Perinatal mortality          | 1.01       | 0.98                    | 1.04 | 0.355   | 91,925 |
|                                                 | Early neonatal mortality     | 1.00       | 0.96                    | 1.05 | 0.954   | 89,216 |
|                                                 | First-day neonatal mortality | 1.00       | 0.95                    | 1.06 | 0.992   | 89,216 |
|                                                 | Stillbirth                   | 1.02       | 0.98                    | 1.06 | 0.305   | 92,020 |
|                                                 | Antepartum stillbirth        | 1.02       | 0.96                    | 1.08 | 0.536   | 75,752 |
|                                                 | Intrapartum stillbirth       | 1.01       | 0.95                    | 1.08 | 0.777   | 75,752 |
| Mother's education (per level)                  | Facility birth               | 1.24       | 1.21                    | 1.27 | <0.001  | 91,905 |

|                                                     |                              |      |      |      |        |        |
|-----------------------------------------------------|------------------------------|------|------|------|--------|--------|
|                                                     | Caesarean section            | 1.12 | 1.08 | 1.17 | <0.001 | 91,415 |
|                                                     | Perinatal mortality          | 0.96 | 0.92 | 1.00 | 0.043  | 91,925 |
|                                                     | Early neonatal mortality     | 0.98 | 0.93 | 1.04 | 0.600  | 89,216 |
|                                                     | First-day neonatal mortality | 1.06 | 0.98 | 1.14 | 0.132  | 89,216 |
|                                                     | Stillbirth                   | 0.94 | 0.89 | 0.99 | 0.014  | 92,020 |
|                                                     | Antepartum stillbirth        | 0.94 | 0.87 | 1.01 | 0.082  | 75,752 |
|                                                     | Intrapartum stillbirth       | 0.95 | 0.87 | 1.04 | 0.246  | 75,752 |
| Distance (logarithmic) to closest facility offering |                              |      |      |      |        |        |
| Any childbirth care                                 | Facility birth               | 0.62 | 0.60 | 0.64 | <0.001 | 91,905 |
|                                                     | Caesarean section            | 0.90 | 0.87 | 0.94 | <0.001 | 91,415 |
|                                                     | Perinatal mortality          | 1.00 | 0.98 | 1.03 | 0.819  | 91,925 |
|                                                     | Early neonatal mortality     | 0.99 | 0.96 | 1.03 | 0.757  | 89,216 |
|                                                     | First-day neonatal mortality | 0.97 | 0.93 | 1.02 | 0.231  | 89,216 |
|                                                     | Stillbirth                   | 1.01 | 0.98 | 1.04 | 0.624  | 92,020 |
|                                                     | Antepartum stillbirth        | 1.02 | 0.96 | 1.07 | 0.560  | 75,752 |
|                                                     | Intrapartum stillbirth       | 1.04 | 0.98 | 1.10 | 0.222  | 75,752 |
| Comprehensive Emergency Obstetric Care              | Facility birth               | 0.69 | 0.66 | 0.72 | <0.001 | 91,905 |
|                                                     | Caesarean section            | 0.80 | 0.76 | 0.83 | <0.001 | 91,415 |
|                                                     | Perinatal mortality          | 1.04 | 1.01 | 1.07 | 0.006  | 91,925 |
|                                                     | Early neonatal mortality     | 1.02 | 0.97 | 1.06 | 0.465  | 89,216 |
|                                                     | First-day neonatal mortality | 1.00 | 0.96 | 1.06 | 0.865  | 89,216 |
|                                                     | Stillbirth                   | 1.06 | 1.02 | 1.10 | 0.002  | 92,020 |
|                                                     | Antepartum stillbirth        | 1.02 | 0.97 | 1.08 | 0.449  | 75,752 |
|                                                     | Intrapartum stillbirth       | 1.14 | 1.07 | 1.21 | <0.001 | 75,752 |
| Emergency Newborn Care                              | Facility birth               | 0.78 | 0.75 | 0.81 | <0.001 | 91,905 |
|                                                     | Caesarean section            | 0.84 | 0.81 | 0.88 | <0.001 | 91,415 |

|                           |                              |      |      |      |        |        |
|---------------------------|------------------------------|------|------|------|--------|--------|
|                           | Perinatal mortality          | 1.06 | 1.03 | 1.08 | <0.001 | 91,925 |
|                           | Early neonatal mortality     | 1.03 | 0.99 | 1.07 | 0.118  | 89,216 |
|                           | First-day neonatal mortality | 1.03 | 0.98 | 1.08 | 0.201  | 89,216 |
|                           | Stillbirth                   | 1.07 | 1.04 | 1.11 | <0.001 | 92,020 |
|                           | Antepartum stillbirth        | 1.07 | 1.01 | 1.12 | 0.015  | 75,752 |
|                           | Intrapartum stillbirth       | 1.10 | 1.04 | 1.17 | 0.002  | 75,752 |
| High-quality routine care | Facility birth               | 0.69 | 0.66 | 0.71 | <0.001 | 91,905 |
|                           | Caesarean section            | 0.82 | 0.79 | 0.86 | <0.001 | 91,415 |
|                           | Perinatal mortality          | 1.02 | 0.99 | 1.05 | 0.120  | 91,925 |
|                           | Early neonatal mortality     | 0.99 | 0.95 | 1.03 | 0.632  | 89,216 |
|                           | First-day neonatal mortality | 0.98 | 0.93 | 1.02 | 0.302  | 89,216 |
|                           | Stillbirth                   | 1.04 | 1.00 | 1.08 | 0.033  | 92,020 |
|                           | Antepartum stillbirth        | 1.02 | 0.97 | 1.08 | 0.405  | 75,752 |
|                           | Intrapartum stillbirth       | 1.08 | 1.01 | 1.15 | 0.018  | 75,752 |
| Vignette score >12        | Facility birth               | 0.73 | 0.71 | 0.76 | <0.001 | 91,905 |
|                           | Caesarean section            | 0.80 | 0.77 | 0.83 | <0.001 | 91,415 |
|                           | Perinatal mortality          | 1.03 | 1.00 | 1.06 | 0.033  | 91,925 |
|                           | Early neonatal mortality     | 1.00 | 0.97 | 1.04 | 0.889  | 89,216 |
|                           | First-day neonatal mortality | 0.99 | 0.95 | 1.04 | 0.758  | 89,216 |
|                           | Stillbirth                   | 1.05 | 1.01 | 1.09 | 0.006  | 92,020 |
|                           | Antepartum stillbirth        | 1.01 | 0.95 | 1.06 | 0.823  | 75,752 |
|                           | Intrapartum stillbirth       | 1.12 | 1.06 | 1.19 | <0.001 | 75,752 |

#### 4) Three-level random effects model

To account for clustering of outcomes due to multiple deliveries of the same mother, we used three-level regression models with mother at level 2 and village/suburb at level 3. Results when using three-level regression models (Table A8) were similar to those using two-level models (compare Table A2). We used two-level models as our main analysis because the running time for three-level models was extremely long.

**Table A8: Crude associations of cluster-level facility birth, wealth and two distances with three mortality outcomes using a three-level random effects model**

Each line of results comes from a separate regression model of an exposure on an outcome, using surveillance data from 2000 to 2009 (for antepartum and intrapartum stillbirth from 2003-2008, for maternal mortality from 2000-2008).

| Exposure                                            | Outcome                                | Odds Ratio               | 95% Confidence Interval |      | p-value | N       |         |
|-----------------------------------------------------|----------------------------------------|--------------------------|-------------------------|------|---------|---------|---------|
| Cluster-level facility birth (per 20% increase)     | Early neonatal mortality               | 1.02                     | 0.99                    | 1.06 | 0.209   | 95,262  |         |
|                                                     | Antepartum stillbirth                  | 0.99                     | 0.95                    | 1.04 | 0.700   | 77,786  |         |
|                                                     | Intrapartum stillbirth                 | 0.95                     | 0.91                    | 1.00 | 0.074   | 77,786  |         |
| Household wealth (per quintile)                     | Early neonatal mortality               | 1.03                     | 1.00                    | 1.07 | 0.037   | 102,146 |         |
|                                                     | Antepartum stillbirth                  | 1.04                     | 0.99                    | 1.08 | 0.099   | 78,702  |         |
|                                                     | Intrapartum stillbirth                 | 0.94                     | 0.90                    | 1.00 | 0.032   | 78,702  |         |
| Distance (logarithmic) to closest facility offering | Any childbirth care                    | Early neonatal mortality | 0.97                    | 0.94 | 1.00    | 0.075   | 110,161 |
|                                                     |                                        | Antepartum stillbirth    | 0.99                    | 0.94 | 1.04    | 0.603   | 79,398  |
|                                                     |                                        | Intrapartum stillbirth   | 1.05                    | 0.99 | 1.11    | 0.079   | 79,398  |
|                                                     | Comprehensive Emergency Obstetric Care | Early neonatal mortality | 0.99                    | 0.95 | 1.02    | 0.357   | 110,161 |
|                                                     |                                        | Antepartum stillbirth    | 0.98                    | 0.93 | 1.03    | 0.324   | 79,398  |
|                                                     |                                        | Intrapartum stillbirth   | 1.14                    | 1.07 | 1.20    | <0.001  | 79,398  |
